# Supplementary material
Source: PubMed Central journal article supplement (PMC3555526)

## SUPPLEMENTARY DATA

TABLE S1. Marker sequences used for comparative mapping between *B. napus* and *Arabidopsis* and between *B. napus* and *B. rapa*

---

> S10T2-90-Rs1046A

TCGAGATGAAGCAAATAAACGAAGGAGGAGATATTGACTTAACGGACGAGGACTTGAGTGAGCT  
C

> SCD2-Rs1046A

TTAAGCTCCCTAAAACCTGGACAATCAAACCTGCCTACAGTGAGCTATGTAAGGGAGAGAGATCTAC  
AGGAAAGTAAGACGTTACGTACCATTGTTCAATATTGGTTAGTCGTTTCTTCTTCAATGATGA  
CAAGTGAAGGAGATCCCCTTTTTGGGACATTTTCCCACAGTATAGTGACGTGTTACGCAAGAAAC  
CTATAGAATCTGTAGATTTTCGAGACAAACAGACACACCCGGAGAGGGATTTCGGACAAAACGATTAC  
AGTTTCCGACGAAACAAAATCAAATCACCGATATATTACCACAATCTAAAGACGTTTCAGAGGAAT  
AAGATCACCCACAGAGAACAAAAAAAATGATGGGATCCACCATAAACTGAAATAGAACAAT  
GAAACTGGGAGGAAGCGAGATCGGAAAAAAAATAAGGAGAGAGAAGAAGAAAAGGAGCGAAGGAG  
CGACTGTAGGGATGAGTAAACAAAAAAAATAAGAGAGAGAGAGAGAGAGAGTGTGACATTGTT  
GTTTCATCCTTCGACTTCGGAGGGTTTCTTCTTTGATCCCCGTGGAATTC

> E4M9-150- Rs1046A, including the flanking sequences

AGCTCATGTCTTCTCCTGCTCAGGTTGAACTCATCTCTTCCCAATCCGATTCTTAGGCTTCTTGCCA  
CGTGTAGGTTAAGATCGTTTAAAGTATTACGCCTCTAGTTCTTGCTGATTGAATCTGTTGGTTTGAGA  
TTAGGTTGAAAGATCAGTGGCGTATAACGAGCACAGGCCAAGGACTCCTCCACCAGACTTGCCAT  
CTATGCTTCTTGACGGGAGAATTGTTTACATTGGCATGCCTGTAAGTGATTCTTGGTGGAGAGACT  
GTTGATTGAGAGTAGTGTTGTGGTGCTTACTGTAATTTTGTGTTTGTGATTCAGCTGGTGCCGGCGG  
TTACGGAGCTGATTGTGGCCGAGCTGATGTATCTTCAGTGGCTGGATCCCAAGGAGCCTATTTACA  
TTTACATCAACTCCACTGGGACTACTCGTGACGATGGCGAGACTGTGAGTTCTTGAACACTTCTT  
GAATGATTTAGACTCTTTTTCTGAGTGTATCTAATTTTGGACTCTTGCAGGTTGGAATGGAATCAG  
AAGGTTTTGCGATATATGATTCTCTGATGCAACTTAAAACGAGGTAACGTTTATCTTTAAACTAAT  
CGTGAAATGCAAAAAATATAAGTAATAAGCCGTGAAAAAAGGAATCTTGAACAGTTGTGTATATAT  
TGTCTTCGGAGTGTTTTTGTGTGAGCAGGTTGGTGGTTCTGACTTGTGCAGGTACATACAGTGTGT  
GTGGGAGCAGCCATAGGTCATGCATGTTTGTACTTTCAGCGGGAACAAAGGGTAAACGGTTTAT  
GATGCCACACTCCAAAGGTATGTATATATGAGTGCATGCTGGTTGACTGGATTGCTCATTCTTGATA  
ACAAGAGATTCTCATATGTTTTAACCAATATGTTGCAGCGATGATCCAGCAGCCTCGTGTTCCCTT  
CTTCTGGGTTGATGCCAGCCAGTGATGTCTGATTCGTGCCAAAGAGGTTTGATGTTTCTACACTA  
CGTATCCTGGAATCAAATCTAATTTCAACTGAGATATTTTCATGATGTTTTGCTTAAACGTTTCTCT  
TTTGAGAATTTGGCTCGGAATACTAACCTTGAGGTGAAGGAAATTGAGTTATAGTACATCTCTCAC  
GTTCTGTTGCAATTGCAGGTTATAACAAACAGGGATATACTTGTGGGACTACTAGCAAAGCAC  
ACTGGGAATGTGAGTGGATAACATTTCTCTGGCTTTATAACTTTGAATGGAGAACTTTTTGGCTG  
ATTAATAATCGTTATAATTTGTTATTTAGTCCGTGGAGACTGTGGCTAACGTGATGAGAAGGCCGT  
ATTACATGGATGCACTAAAAGCTAAAGAATTTGGAGTCATTGACAAGGTAAAGTTTATGTGCTGTA  
AAGTACTATGTAGGACTGTCTATTTGTTCTTAATTAGAATGTTAGTCTTTGATATTCAGTAATCGTTA  
AGAAATTTTGTAACTTGGTCTCACAAAAGTTTGTAAATTTTGTACCAGGTTCTTTGGCGTGG  
TCAAGAAAAGATTATTGCAGACGTGGTTCCTTCAGATGAATT

> SCE3-Rs1046A, including the flanking sequences

ATCTTCTCCAGTTGAAAACAGCAGACCACGAACTCGGAGCTGGACATTTGGAAGTGTGTGTGTG  
TTGATCCCTGTTCTTCGTATCTCTTTCTGCATATGAAAATGAAACGCTCTTTGAACTTTTTATTTTG  
TGTATGTATGAATTTGAAAACCAGATCATTGTGTGTTGCCTGTGTAAATTTGTAATCAAACAGTCG  
AAATCCTTTTCTGAAATGTACAAATAATATATCACTGCTTTGATTTGTATACCAAAGTGTACAAATA  
ACTTTATACCAAATTTTTACTCACCACGCAAATCATAACAGCATCACACAACAATTTTATTTAATTT  
TGGTACAAAGTGTTTTGAGGTATCACTCACACTTGTGTCTATAAAGCCTCAGAAAGAAGAAAAGA  
AAAACACACAAGTTTCTTCACACCAAATTTCAAACAATCATAACATGAGAAAAGATAATACGAT  
ACAATTGAAGATNAACGCACCGTTTGCTGAAANGGGGATTCTGAANGCGATTGCGACTAAGGTT  
TGAGATGGATTCGGCGCANC GCGGACTATCTGGGACGGTCCCGCTACANTAAGGTCAGGAAGGT  
CAGGCATGATTCGCAGCTCTGANACGGTTGATGCGGAAGAAGATTCACCCAAGCCTTAACGCTGA  
TCTCTCGAAAGAACTACCGAGTAAATCAACTTCACCAAGAACGGGAAGTCTTCACTTGTGTAAT  
TC

> SCD7-19514A

GAATTCAAACGATCCATAAAAAGACAAATATATACTTTGCCGCGCGATCCAGTCAAAGCCGAAGG  
CCGAAGCAAACATTTGCTTGTTCCTCTGTCTCTTTCCTCTGGAGAAATCACAAGTTTACTTTCT  
CTCTTTGTAAATTAGATTTATAAGCCCAATAGATAAAACAATTATACGGCCAATAAGCTGAGCCCA  
TTATGACCTCCTTAA

> SC9-H-Rs1046A, including the flanking sequences

TCCGAGCTTGAGCCCTTGTCTAAAGCACAAGCATGTCCCCTTTCAACAGCAAGCGTGCTTAGACA  
CGGACAATAAAAGATGTTAACCCGAGAGATGATCAAAGTTCAAATGGCATGGTCGTGTGGTGGGC  
AAGAGAAAAGGCTCTCTATGCATTGCTCTTATCTATCTGGGAGGTGACAATGTTCTAATTAACGTT  
TGAGACTCTTCAATTAATTTTTTTTCCATGTCATTAAGTTTATTCTTTATTTTGTGTAACATTTTTGTT  
GGCTAGCAGAGATGACGATTAACCACTGCGTAATAAACTTAATAAATGGTGTTTTTTATGAAATGT  
AATCTCTTTCTGAATCATGTACTTCAAACAATAATTTCAATTCGAGTCTTTGGAGTTGAATGAATCT  
ATTTATCTTACATGTAACACAAACAATAACTAAAGGCATTGTGTTGACAAATAGTATGTTTTTGT  
TTTTTAATCTCGAAGGCCTAATTC AACCTCCAGTTCATCATCTTCCTCAAAGAGCTTCAAGAGTCG  
AGCATACTGCTCGTCTCTTTTCTTCTTCTGCCATAGCTTGTATAGGAAAAAGGAGAACATAGCTAC  
AGCCACTAATCCAACCAAGTACGAGGATTACTTTTTGTCCCTGTTCTGCTTGAAGTAGTGTGAGACTC  
TGCCTTAGCTCCTGTATTTGCATTCTTGGAGTCACCAGATAGACCTGGACAAAGACAATAGATGCC  
ATCTTAGCTTTTTTAAACGAGGAGAAATAACTCCACGCATAGAAAACAGAGAACATCAATTGCAAC  
AATCATTATAACATGGGCTACACATCAAAAAGATTATAACTTTACCATATCATTACAGACATAAATTT  
TGCAGACAAGCTATTCAAATTAGCAGAACCAACCCATGAACTGAACGGTAACATGTTCTCCTCAC  
TAACATCATGTTAAAGAAAGCAACTTTACTGTTTTAGTAAGTATTATGTATGGCGTAGTTTCTTAGC  
TGCTCAAGATCTAGTAAGACATGTAAACGGTTCTCTCTATCTCTATATGTTTCAATCCTGATCGCTA  
AAGAGCAAAGACGTAACCTTTATGCCTAGAGATCACACAAAACGAAATCTACAAAGAGCTTCAG  
CTAAAATTAGACATAAATCTAAGGCCTTTGAGAACCAAATCAGATAGATCTGGAGAAAGACAAAC  
CTACGACGAAGTGCAGAGCAATCGAAGAGAAGAATACAACGCGCCGC

> E14M1-Rs1046A, including the flanking sequences

TTTAAAAAAGAGTTTTTTAGCCGAATATAAAGAATCTTCTTTTAAATTTTTTAACTAAATAAACTAAGAA  
CAAGTTAAAGTCTCATGTGTATACATTTAGAGATACATACAGATATGTA AAAACAATGTAATAAAATA  
TCAACACAAAGGTACTTAAGTAGTTTGATAAAAAAAAATTCAGCAAAAAAATACAATGTATACAT  
AAAAACAGTTACATTATAAATGTC ACTTTATATTTGTACACACATATTA AAAAAAACAATTTTGTGTA  
TACTTTTTATATAAAAACATCATTATCCATACACATAACTATATTTGACCAATAAAAATTA AACTGAA  
AAATAAATTTAATAAATATGCATTGAAACAGTTCGGTGAGCTTAGTCCAATCTAATTGATCCATGGG

ATTAATAATCATCTTATCACTAGAAAGCTATAATTTTCATTTTGTTTTTTACCATTAAAAGAAAATAAA  
ATAAAATCAGGGATGACAGCATTTCAAAAAGGAATAAAAATAAAAACAAGAAAGAGCGCATCTGA  
AGATCAAATCACAAAGTAACGAAGCAAACGAGGAGGAAGATGAAGGGGTAGGGTATTGGCTAA  
TGGTGGTTGGTTCACTGAGACTAGCTTCGGTTTGGTTTGGTTTCTCCAACATTTGGGCTCTTCGTC  
TCGCCGTCTTCTCTCAGACCACCAGTTCTGTTCTTCTCCTCCCTCCTCTTTTTTCTTTTTAATATCCA  
TTTTACAATTGTTCTATTAATGGTGCTTAAAATTCGTTACTTTCGTTGTTACTTGAGAAAATTATT  
CTATCCAATTGACTTCCTTAGTCTCTGAGATCCTCCTAGTCATACATTTGTCAGTGCATGTAAGTGTG  
TTTTGTGTAAATGATAATGCCACGTTTCAGAGGAAGTACTAGTTCTTAGTTTTCCGTGACTTCATTGAG  
TTATGGATCCAATTTGGGATCCCTAAGCAGTATGAGATGTAGAACATGGGGCTTTCTGGATTGATA  
TTGATTTTTTGTAGTCCATTGAATCTGTAAGGTCAATGGTTTTGTGAATTCAGTTCTTTGAACATA  
CATATCCATGCTCTTTCTAGTTGCTTATTTTTTTTTGGTTCTTAATGTTCTCTAATTGCAAAGTTGAG  
CTAGTTGGTATTTTTTTTTCTTGATCATTATGGCTTTTTTTTTGTTTATCTCTCCAAGATTAGTCTTTCTTG  
CAAGTTGAGATTATTAATTTACAGATTATCTTTTGTGTTGCGTCCCCGGAGTAGTTGTTCAAAGTTTC  
TTCAAAGTTATAATGATGTGAACGTTTGGGAATATTAGAACTTTTTAATTGCTCGTAATAACAAGTCA  
CATGACTGGCTATTGTGCATGATCCTCCCTAAGTTCAACTTAGGCAGTTACTTTTCATTGAGGACAA  
TGTTTGTCTTGGTCTGACATTTTTCTCAGTGGATCCCTGTTCTTTGAATCAACATACATGATATGT  
AGGAGAAAGAGACTAGCTAGTACCATAAGAACAGCAGACCGAAGCAACACATCCAAGAAAGATA  
TGAAATCTTAGTAATTCTTATACAGTTCATTGGTGAAGGAAGTACTTTTAGGAAGTGGACCACCAT  
TCGCTAGATTTTAGGAAGGGGGAAAGTATTTGGATCTAGAATTGGTTACAGTTTACAGAGTCCAAT  
GCATAACCTTTTTTCTTGTTGATACAATACTGTTGAAGTAAGTCAATGACCAGCTG

> SCD8-195A14

GAGCTCATAAAACCTTTAACTAAATGGTTAGGACATATATTTTGGTTTGGTTCCTTTTTTCCCCTCA  
CCCCTAGTGAAAACACTAGTGTTAAAAGAGCTGACTTACTTGACAAATTTGCATGAACCGAATGC  
TACAATCCGTCATCGTCGTGTCGGAAGCGATTGCAAACCTCAGATAACACCGCCACAAACTCAGAA  
GACGACTCCAACCCCTCGTCAGCTTCGTTCAAGTCAAAGACAACCTTTCTCGCCCGTCTAAAATT  
CAGCTCCAACACTTCCTCAACGTAAGGCCGGAACAGCACCAAGAACAGCTTAGACAAAATCAAC  
CCCTGCGGCTCCAACGCTTTGCAGTAGTTAAGACAGTCTTGCAGACACACACTCGCCGCACGCA  
ACGCGTAAACCGTCTCGGAAGGAGCCGCGTTCTCTTTAACCAAACGGACCAAGTACTCGA

> SC6-a-19514A, including the flanking sequences

ACCTTCCTCCAAAGCCTTCTTCGCCTTCTTGCCATATACTTCAACATTCCTCCTCAGCTCTTTCCCT  
TTCTCTCCCTCCATCAACTCCTTCACTTTCTCTGCAACCTCTCCTCTCCTCGCAACTCCATCACTCG  
CCGCCACCACTCTCTCCGCCACTCTCAGCTCTTCCACCACCAACATCGCATTCAAAGGTTGCTCG  
GCTGCTACAGGAAACGCCAAGATTGGAACCTCGGCGCAAATGCTCTCCATCAGAGAGTTCCACC  
CACAGTGGCTCAAGAACCCTCTTACACTCTCGTGCTCTAGTATCTTCCCTTTGATCAACCCATTCAT  
CTTTCACCACCATTCCTCTCTCTCCCACTCTCTCTTCAAACCCTTTCCCTATTTCACTTCCTTTAC  
CACCCAAAGAAAGTTCACCTTTGATTCTTCCAACCCTAGCGCAATCTCCTCTACTTGTTCTCTAGA  
GATCTCGGATTGTGACCCAAAAGCCACGTAGAGAACGTAGCATCCCTTGTCTCGCTTTTTCATCAA  
GCCATTTTCATCCAAACAGATTTGACCTTCTCTTCTCCCTCATCCTCCAAGCTGAAAGAAACAACA  
AGGTACGCATTCATAATCATATTTTCTGCATTTTCTTATTGATTAGTACTAGACTTATGAGCAAATCT  
CATAAATAACACTTTTTAGTTTTATCACAAAAATAGCATTTAAAAAACATTTTTCTTTACATCATA  
AACCTTTTATATCTCTAAATACTAAAAAAAATTTGTTCAAACCTAAATACTAAACTTTTAAGTT  
TGAACCTACTACTAAAAAATATATTTTACCCTTTTTGATAAATGGTAATTTTGAAGATTTT  
TTTTTGTATGCTATTTTTGAACAAAAAAAATGATTTAGTGAGATTGAAGAATATTTCTCTAAAGAC  
TTATTTACACAAAATCATAATTAATTAGCTTACGAGTTTTTTCCAAGACAAAGCGGTCCAAGTGCC  
CATGGCTTGAGCTCGCGTGTACGCTTATAGAAATCTATAAACACCGGCTCAAGATCATCGAATGTG  
TTGAATATGATACCTTCACTCTGACTCATAGATGCGCATTGATCTAGTATAAGCTCGAATCCAGGAT

CCGTGGTGGGTTTTGTATCAAACATATCTTCAACAAAATCACATTTTCTAACCTTAATCCACGGAA  
ACTCCGGTACAGCAACAGCCTCCGTCTCCGACTTAACATTAGACAGAAGCTGGTTTTTAAAAACA  
CTGTCCAATATAGAAGGGGACATGCAGTTCATGCCCAAGAAAACAAGCCGAGGAAACCCTAGCT  
TCAGAGCCGACTCTAGCGTCCACCACAAGAAACCGTCAGAGACCATGAAACTGACGCGTGGCAG  
TGACGTGAGCTCCCGCTCGAAGTCGGGCTGCATTGACTTGGTGGCTCT

> E1M2-310-19514A

TTAACATGGTAGTATGCAAGTTTTATGGGTAAAGTAAACTAACTACCTTTTCAGACATGGTTCGTTGT  
ATTGATGTTACATTGCTGGATGGGAATACAAATAAATAACAATAGTTGATATATATATCATATGAA  
ATATATAAAATATTACGGAAACCAACCCACCCACCTAGTAGCCACCGTAAAGAACTTTCGAAAA  
AAGAAAAACACATAATGGGCTAAAACCTATTCCACATCTTATTGGATAAATAAGATTATTGTTGAC  
AGCATACTTGTGGGAATTC

> SCHDF-Rs1046BH

TCGACTCCCACTGTGGTCGCAATATTTTTTATTTTTGAGATATTTCTTTTTGAGCTTTC AAGGAA  
GTTTGAAGCTATCTCATTGCTTTC AACA AAAACAGTAACTCAAACGAACACTAATCCCTTCTCTAT  
TGAGCTTTTTGAAAGATAAAAACA AATCAGGTAAAGATTCATGAAACATGAACAAGGTTGATTGA  
TAAGCCCTGTTTGTAGCTTTGGATCTCAATATATTTAGTATTC ACTACTAAAACAGTAGTGTTCCTC  
ATCTCATATCTATAAAAAGAACAATGTTATTATTCATTAGGTGCTTATAAAGAAAACA AAGATGTCC  
TTGTGCCAGAACTCCACATAACCTTTTATTTGCAATTAAGAACGGTCACATAAGTTTCAGCATC  
TTCAGCCTTGCTTCATGCTCTGCATCCAGCTTCGGGGGAGTGTAACAGCCATGAAGATCCTCCAC  
AATGTACTCTTTCGTGAGCTC

> HDE-Rs1046BH

GAGCTCATCCAGAGAGGTCCAACCTCCTGAACCTCTCTGTCAAGTCATGCTTCGTGTTGGTGATCT  
TGACCGTGCCATCAAGTTCTATGAAAAGGTGATGCAACTCCTTGTATAAGGCAGTTAACATTGCTG  
TTTTATGGAAAGCTTCTAGCTTGCTTACCTCAATTTTCAAACCCTGCAGGCCCTAGGGATGAGACT  
CTTGAGAAGGATTGAGAGACCTGAATACAAGGTGAAGTAATCAATGATACTTCTTGGACAAGTAG  
TTTACCCTTTTGAGATACGTTGCGACTCTTAACGAGTTTTTTGTTTAATGAAACAGTACACCATAGG  
CATGATGGGATATGCTGAGGAATACGAGTCGA

> SCHDB-Rs1046BH, including the flanking sequences

GATATCTGTGATCAGAAGTCATGCAGAGGTCATTGTTAATGATGGTATCGTATTCCCAGTTTTTAAG  
AAATTTTGCAAGGTAGAGATCAGGCTTTTATGTGGATTCAGTTTCGTTACTGCTTGCAATCACACT  
ATTAAGCGAAACCTCAGAGTATCTATTATTGTTTTCAATGCCACTCTTGATTCTTTTTTGTCTGAAG  
AAACAACAAATGATTTGGTGATTTCTCTTTC AATTTGCAGAGAGCTCCACCTTTAGGTTCTCAAGA  
GGCATGGTTGGTTTTTTGTAAGTGATGCTTCCACATTGGCATTTCATTAAATATCAACAGCTTGAAA  
AAAAAGTTTCAGTGATGTTAAACCTGTGTCTGTTTTGTGAACTCAGAGACAGAACCGGCCGCAACT  
GCATCCCTGATGAACACTATGTGCAAACATTGCTTACGGTAATCACATATCTTAGAAACATCTCTTC  
AGTTTGTGTTCTTTTTCTCCATGTAAAAAGTTTCGTATTAATTACGTTACTATAACCATTTTTTATTTT  
CAGATGCGTGGACTAGAGAGTGAAATGGAACGAAGAACTGACATATACTGTATGGAACGTTTTT  
GGGTTCAAAGTATGAAACCCAAACTTGGCATCCCGTCACTTTCACATTTGAGA ACTCTGGCCCTG  
GCCAGATAAAGGAAATAAAGGTACATTATATCTTTGTAAATGATATGCATCACAACCATTGGATCTA  
TACTTTTGAGTAATCATTAAATTTTTTTTTCTTGGAAACAGAGAATAGACCATGTCTATTACGAGACTG  
AATCACGAACAGAATGGTGCAAGGCAGACTCAAACCCGTCATGCTTTCTCTTTGCAAGGAA  
ATTC ACTGAAGGAGCCGCAATGCGCCTTGTGAGGGAAGGACTTATAGGATCGTCTAAAAACATAA  
CTTTATAAGTGATATATTTAACTCAGGAACAGTGTAAGCAAAGTGTTTTAGGTGACAAACTGAGAA  
AGGGGTGCGTATCTTCTAGGTCAAGCAACAGAGAGTTCACATAGATTAGGTAATAGCATTGATAAC

ATCACTCATGAGGTCAAGCAACTACTTTTCGAATTTTGTGGTAAACATTTTCTATTAATATGTCTG  
AAGAAAGGGGCTTTGATTAATATTATGTCTTACAACATATCATTTACCAATAATAAAAACAGCAGTT  
TTTATTTGTTCTTCTGAAACCGGTTTTGATGTTTTAATCACGGTTTCAAAGTGTTTGCAAGCAG  
TTCAATTTTCTTAGGATACTCTCTCGCCCCGAAGATCGTCGATCCTATTCTCACATTTGTGCTTCC  
CAGTTCAATCTGCAAATCAAAAAAACAAGAAAACCTTTTTTAGCATTTTGAGTAGAACTCAGTG  
TTCTGTGCTTAAATGAGCAAACATGGTGTGTAACAGAACTTACGGCTAATTCAAAGTCACCGGA  
CATCCCATGGATAGCTCACATTGCTCCTCAGGTATTCCAAGCGCCTCACACACTTCACTTCTGCA  
TTTTGCAAGCATCTACACATACAATGTGATACAAAAGAGAGCCTTTTTTGGTTAGTGTTCCCGTG  
ATATTACCAAACGTTTCTTTAGATTTCCATTCAGATTATATAAACCTTGAAGTTCTCTGGGGTTGAA  
GTGTAATCAGCCATCCCTATTGTCATCAAACCAGAAAACCTCAAGGTTTCGAGCAGGCTTCCTTAC  
ATGCTTTGCTAGTCCACGCATCCAGAGGGCTCCACGCCGAATTTGCTGCAAGTATCAGTGAGAT  
GATCATGTAAAGAACCGTGGAAATGGAAACATCTGAGCTGGATAAGAAGAAAAAGTTGGAGACT  
TCAAGATTCTTACACTCTTCGCCACTGGTATTCACTTGAACCAAGACCTTCAGAGGCTTTCTTCCG  
ATGTTTCCAACCACAGATCAAGCATGTTTGAATCTATGAAGCAAATGAGATAACCAGCGTTTGT  
CAGATGCATGTTCCCTGACGTTTCTCTAGTTTACTGACAGGCATAACAATAAGAAACAAGTAA  
CAAGGTCGCTTTCAAAGAGCTCTCATATGATCCGAGACTCTAAAGACCCGCGTGTTTTACTACTA  
AGTAGCTGTAAACAAATCTATAATGTAACGTGGTTAAGTTGAAGGAATTCCAATACCAAAAACCA  
GCAATATCTTTGTATGTTACAGATGATTTTTATATGATTTGATCTTAA

> HDD-Rs1046BH, including the flanking sequences

TTTAAAGATTTTGTAGTGAAAAAACCCCTCAACTATTTTCAATCGTAAAAAACCCCTCAACTAAG  
TTTTCAACATTATACAACTTACAACTGTTAACGTATGTCACCCTCCGTCACGGTTTTTTAGACGG  
AGGGTAACATATGTTAACGGAATTGAAGTTGAGGGTTTATTTACATGATTTTTAGTTGAGGGTTTA  
TTTTACGATTCATCTTTAGTTGAGGGGTTTAACTACTAAAAACCAACTAAATATAAAGCTCTCTAC  
TTTTCTATCGAATTTGCCAATTTTTCTCATAAGGTCATAGTTCTGATTTGACCCATTTAGATTAAGGA  
CCGAACAAAACAAGTTGCAGGCTTTGTGTTTCTGGTTTAACTTGAACTATAGTTTTATGTTCTTGC  
CGCATGATTGTAATAGAAAGTTTCCATTTTTGGAAATGTTATAGGTTCAAACCTAAGTTTTTGATGT  
CGGATTGTGTTTATGTTGTAATGAGCTCCACTATAGCGCAATGGAGTCTATCGTTTATGTTT  
CTAAGTTTACTATGATCATAAGATTAAGAGGAGTCACTGAGTTTGATAAGCTAGCAAACCGAAT  
AACTTCATGCTGATCAATAAACCGAAGACTTACTACATTGTTTGTTCATTTGGGCAGCTTGTATG  
CTTAGCGGATCTTGAGTTTGATTACATCAACCCTTACGACTCTGCATCGAGGATAAACTCCGTGGT  
TTTACCTGAATTCATTATCCAAGGAGTTCTATGTGATTCTATCTCCTAACAGGACACTGGTTCATG  
TCACTCTTATGTCTCCCTTATCTCTACTACAACCTCCAAGTCTGTTTTTTTTTCTTACAA  
CTTATCAACATGGGTGATTGTCTTGATTATATCTCATTCGGTGTCTCTGTTGTTTCAAGTACTCGAAG  
CGACAGCACTTGGTAGATGTCACGGAGATATTTAACTTGCTTAACTGGGAAAAGAAGAAACGGCT  
GTTCAAGCTTGCTTACATAATCCTTAACTCTTTCTCACTATCTTCTGGTAAATAAAGATGAACCTG  
TGCTTTTTTCAATATTGATCAGACAGCTAACATAGGCTTCTGTCTGCAACTTTTTTGTAGGATGATT  
TACTCGGCGATGGATGATTACGAGGACTGACTGATGAAAAGGCGATCTAGCTTTTTTTGGTTTTTC  
ATCGGTGGCGCCGGTGGTGGTGGACATGAGACAGATGAAAGAACAAGTGTGTTGCTTGTGGTAC  
AAGTTTAAATGTTGTTTGTAAAATTACTAGCAGAAAGATTTGTGTAGTTTTGTTTCTTTCTTAGTAAC  
ATTTTTTTCAGATCCTGATATCTGACAGAAACATTACAACCTTAAAAAAGTTCAATGTTAGAAAAA  
GTTTCGGTAATTCAGGCGAATATTCGTCCTGTAATAAAAAAATAATAATTCTGAAGTTAAAAAT  
TCGGTTTAAAGTTACGTAATTAAGGGTTATTAATGGTATAAACCTAGTCCAATCCTTATTTTGTGCG  
TGCTATAGTCATCGTTGTGAAGCCGGAGTGATCTCGTTTATCACGGTGCTTCCTGCCTCTCTCTTT  
CGCTCGAAACAACCTCCATCTTCTATATAGCTTTGATAGATCTAATTGCTTTCGTTACACTGTAGAA  
ACTTGACCTAGATATGCCTGGAATGTTAGATTTGGAATCGAAATATGTTGTGATGCTTAGGTAGCTC  
AAAACAAGTTACGGCAATTAGGGTCATTGTTGTAACAAGAAGGCTAATGATATGGTCAGAGTTTT  
AAA

> P6M6-410-Rs1046A, including the flanking sequences

AGGCCTACCGTACTTGTATTAGCCCAATAGTAAAGGCCCATTAGCCTTGCTCGAATTATTAACGAC  
GTATCTAGAGTTCAAATTGCGTCTGTTTCATACTAGCGGACGACGGTTCTCGGCTTGGATCGTCGT  
CGCGGTTTAGTTTCCGTTAGCGATCCGGCTTCTCCTCGGTACCTGATCTCTCCCTGTCGTATTCTCC  
CTCTGTCTACTCTACTCATAAGTCCATCACCGTCGTCTCTCTTTCAAGCTTCTCTGAGTTGCGAGCT  
GGTCAACAGCAGGTAACCTTCGAATCCTTCGCCTTCTTTTCAAGTTATTCTCTTAGATCTATAGTAAG  
AATACGTCGAAATCAACGATCTGATCTTCTCGATGCAAATTTCAACGAGTTTATGCGGGTAGAAATC  
GGGAAGATGATATGCGTAGTAGTAGTAGTATTACGAGTTTCGATTTAGTCTAGTTCTCGAGG  
CTTGATCACGATCTGGAGATGATCAGTTTGTGGAAGTCTTGTTACGCTGAAACTATAGGGCTTTTAT  
TTTCTGAGAGATGAATTTTGCAGGATACTGTAGAGATTATTGATTCTTTGAGTTGAATAAGCTTAAC  
TTGAACACGATGGATCATCAAATGGATTCGGTGGTGGGAAGTCACTGGGCTATCTCCAGCTGTTA  
CTGAGAAAGATCTCATCGACTTCTTCTCCTTCTCTGGCGCAATCGAAGATATTGATATTGTCAGGT  
GAGTGAGTCTTACTTTCCACCAAATGTGATATCTTGCAATTGATTACAGAGGTTAAAACTATGTTAT  
GTTGTTAACGAGGTAAGATCGGGTGAGCAAGCGCGCACTGCTTATGTGATGTTTAAAGATTCTTAC  
TCTCAGGAAACTGCAGTCTTACTCAGTGTAAGTTTGTGTTTGAATTTGATTCCACCCTTTTTTATT  
GGAGAATGAATCACTAGGTTCTTTGACTTAACTTCAGGGGGCAACCATATTGGAGCAGCGAGTTT  
GCATCACTCGTTGGGGACAGCATCACGAGGAGTTGACTTCTGGAACGCGACTCAGCGCGGTTTT  
GAAGATGACACATACTCACATGTATGAATCAATCTCTTGCTTTTATCTTTCTACAATTGACTATGTTT  
ATGTTGAGAAGTTTATCAAAGATTTTTTTTTTTCTTTGTTTGGTTGCTCTCATGTAGCCTCATCCTCA  
ACGAGGCGAGTTCAACGCCGGAGAAGCAGTGACAAAAGCTCAAGAAGTGGTGAAGTCAATGCT  
AGCCACGGGATTCGTGCTGGGCAAAGACGCATTAGCCAAAGCCAAAGGCTTTGACGAATCCCAC  
GGTGTGTCAGCTGCAG

> BE10-Rs1046A

TTGGGTATGGTGTGGGTTTGCTCATGTGCTGAGGGAGTTTATCATAGAGACGTTTGAGAAAGCA  
GGACGTCGTGAGGAGATTGAGAAAACCTTGAATACGGTTAACCGTCCGGTTAGAAACTCTGTGC  
AGTCTGGTAAGACTCCACCTAGTGTATCCTCAGTGTTAGGAGCCAATGGAAGTGCAGGTCAAACG  
GCGGGAGGAACTTACAAGGCTAATAATGGTCAGAATCCATCTAGGTCCAACACCTCTGTTAACCA  
GCAGCAGCAACCGTGGTCTAGTCCTTCAGGTCATCAGCAATCATGG

> BE10-19514A

TTGGGTATGGTGTGGGTTTGCTCATGTGCTGAGGGAGTTTATCATAGAGACGTTTGAGAAAGCA  
GGACGTCGTGAGGAGATTGAGAAAACCTTGAATACGGTTAACCGTCCGGTTAGAAACTCTGTGC  
AGTCTGGTAAGACTCCACCTAGTGTATCCTCAGTGTTAGGAGCCAATGGAAGTGCAGGTCAAACG  
GCGGGAGGAACTTACAAGGCTAATAATGGTCAGAATCCATCTAGGTCCAACACCTCTGTTAACCA  
GCAGCAGCAACCGTGGTCTAGTCAGACGGCAGGGAAGCAACCACCATCATGGTCGAGTCAGCCA  
CCAGGATATCAACAGCAGCAATATTGGTCTCAGAAACCAGGGTGGTCAAGTCCTTCAGGTCATCA  
GCAATCATGG

> BE10-Tapidor

TTGGGTATGGTGTGGGTTTGCTCATGTGCTGAGGGAGTTTATCATAGAGACGTTTGAGAAAGCA  
GGACGTCGTGAGGAGATTGAGAAAACCTTGAATACGGTTAACCGTCCGGTTAGAAACTCTGTGC  
AGTCTGGTAAGACTCCACCTAGTGTATCCTCAGTGTTAGGAGCCAATGGAAGTGCAGGTCAAACG  
GCGGGAGGAACTTACAAGGCTAATAATGGTCAGAATCCATCTAGGTCCAACACCTCTGTTAACCA  
GCAGCAGCAACCGTGGTCTAGTCAGACGGCAGGGAAGCAACCACCATCATGGTCGAGTCAGCCA  
CCAGGATATCAACAGCAGCAATATTGGTCTCAGAAACCAGGGTGGTCAAGTCCTTCAGGTCATCA  
GCAATCATGG



TABLE S2. Syntenic genes from *At1g10180* to *At1g10400* between *Arabidopsis* and the three subgenomes in *B. rapa* and *B. oleracea*

| <i>Arabidopsis</i> gene | Orthologues in <i>B. rapa</i> genome |                                    |                | Orthologues in <i>B. oleracea</i> genome |                        |                    |
|-------------------------|--------------------------------------|------------------------------------|----------------|------------------------------------------|------------------------|--------------------|
|                         | MF1                                  | MF2                                | LF             | Subgenome I (MF1)                        | Subgenome II (MF2)     | Subgenome III (LF) |
| <i>At1g10180</i>        | N                                    | <b>Bra018457</b> (A5) <sup>a</sup> | N              | N                                        | <b>Bol022073</b> (C8)  | N                  |
| <i>At1g10190</i>        | N                                    | N                                  | N              | N                                        | N                      | N                  |
| <i>At1g10200</i>        | N                                    | <b>Bra018454</b> (A5)              | Bra019956 (A6) | N                                        | <b>Bol022065</b> (C8)  | Bol036761 (C5)     |
| <i>At1g10210</i>        | N                                    | N                                  | Bra019955 (A6) | N                                        | N                      | Bol036760 (C5)     |
| <i>At1g10220</i>        | Bra031705 (A9)                       | Bra018453 (A5)                     | Bra019954 (A6) | Bol031241 (C08)                          | Bol022064 (C8)         | Bol036759 (C5)     |
| <i>At1g10230</i>        | N                                    | N                                  | N              | N                                        | N                      | N                  |
| <i>At1g10240</i>        | N                                    | N                                  | N              | N                                        | N                      | Bol036756 (C05)    |
| <i>At1g10250</i>        | N                                    | N                                  | N              | N                                        | N                      | N                  |
| <i>At1g10260</i>        | N                                    | N                                  | N              | N                                        | N                      | N                  |
| <i>At1g10270</i>        | Bra031706 (A9)                       | <b>Bra018451</b> (A5)              | Bra019952 (A6) | Bol031243 (C08)                          | <b>Bol022062</b> (C08) | Bol036755 (C05)    |
| <i>At1g10280</i>        | N                                    | Bra018450 (A5)                     | Bra019951 (A6) | Bol031244 (C08)                          | Bol022061 (C08)        | Bol036754 (C05)    |
| <i>At1g10290</i>        | Bra031707 (A9)                       | <b>Bra018449</b> (A5)              | Bra019950 (A6) | Bol031248 (C08)                          | <b>Bol022060</b> (C08) | Bol036753 (C05)    |
| <i>At1g10300</i>        | N                                    | N                                  | Bra019949 (A6) | N                                        | N                      | Bol036752 (C05)    |
| <i>At1g10310</i>        | N                                    | Bra018447 (A5)                     | N              | N                                        | Bol022059 (C08)        | N                  |
| <i>At1g10320</i>        | N                                    | <b>Bra018446</b> (A5)              | Bra019944 (A6) | N                                        | <b>Bol022058</b> (C08) | Bol036748 (C05)    |



|           |                |                       |                |                 |                        |                 |
|-----------|----------------|-----------------------|----------------|-----------------|------------------------|-----------------|
| At1g10330 | N              | Bra018445 (A5)        | Bra019943(A6)  | N               | Bol022057 (C08)        | Bol036746 (C05) |
| At1g10340 | N              | Bra018444 (A5)        | N              | N               | Bol022056 (C08)        | N               |
| At1g10350 | N              | <b>Bra018443</b> (A5) | Bra019942 (A6) | N               | <b>Bol022055</b> (C08) | Bol036745 (C05) |
| At1g10360 | Bra031708 (A9) | N                     | N              | Bol031251 (C08) | N                      | N               |
| At1g10370 | N              | N                     | Bra019940 (A6) | N               | N                      | Bol036742 (C5)  |
| At1g10380 | N              | N                     | Bra019939 (A6) | N               | N                      | Bol036739 (C5)  |
| At1g10385 | N              | Bra018442 (A5)        | N              | N               | Bol022052 (C8)         | N               |
| At1g10390 | N              | Bra018441 (A5)        | Bra019938 (A6) | N               | Bol022051 (C8)         | Bol036738 (C5)  |
| At1g10400 | N              | <b>Bra018440</b> (A5) | N              | N               | <b>Bol022050</b> (C8)  | N               |

Note: <sup>a</sup>The chromosome localization of the *B. rapa* and *B. oleracea* orthologues is listed in brackets. *N* indicates that no orthologue is detected in the *B. rapa* or *B. oleracea* subgenomes (MF1, MF2 and MF3) for a given *Arabidopsis* gene. The shading of two columns emphasizes the best syntenic subgenomes in *B. rapa* or *B. oleracea*. PCR primers used for grouping the BAC clones were designed from the *bold B. rapa* and *B. oleracea* genes.

TABLE S3. Primers used for differentiation of the BAC clones and RT-PCR analysis

| Primer  | Sequence (5'→3')            | Annealing Temp. (°C) |
|---------|-----------------------------|----------------------|
| B1      | R: GAACTAACCGATCCAAAGTCC    | 61                   |
|         | C: ATGCAGATGAGTCAGAAGAG     | 61                   |
|         | O: GAACTAACCGATCCAAACTCT    | 61                   |
|         | F: TGCTACAATCCGTCATCGTC     |                      |
| B2      | R: GTTCTTCTTCTTCTTTACATCTTC | 60                   |
|         | C: TGTTTCCGCTGTCACCATTG     | 60                   |
|         | O: GTTCTTCTTCTTCTTTACATCTGA | 60                   |
|         | F: CATCCTCCAIGTGTACTACTTG   |                      |
| B3      | R: GGAGTTTATCATAGAGACGT     | 60                   |
|         | C: AGAAAGCAGGACGTCGTGA      | 60                   |
|         | O: GGAATTTATCGTAGAGAGTT     | 60                   |
|         | F: ATTCTCAGAGTTTGACCATGG    |                      |
| B4      | R: TTAGTGGCAAGCCTATCTTCT    | 61                   |
|         | C: GGAAGAATCGTGATGAGAT      | 61                   |
|         | O: TTAGTGGCAAGCCTATCTACC    | 61                   |
|         | F: TCAGACAAGAAAGCAGCTCGG    |                      |
| B5      | R: ATGTCTAGCTCCCTTTGATAG    | 60                   |
|         | C: GTTGAGAAAGCTTGAGGTAGT    | 60                   |
|         | O: ATGTCGAGCTCCTATTGTATC    | 60                   |
|         | F: TGAAGGGAATCCATCAATGTC    |                      |
| B6      | R: TCTCAAGAAGTCTTACCGGCGT   | 60                   |
|         | C: AGACGTCAGATCTACGATCA     | 60                   |
|         | O: TCTCAAGAAGTCTTACCGAAGA   | 60                   |
|         | F: TTGTTGAGACCTAGTTTGCG     |                      |
| B7      | R: AACCAGCTTCTGTCTAATG      | 60                   |
|         | C: GATCCTGGATTCGAGCTTATC    | 60                   |
|         | O: AAACAAGCTTTTATCTGAGG     | 60                   |
|         | F: CACGTAGAGAACGTAGCAT      |                      |
| RT-ORF1 | F: CACTTGAGGCAATAGATACC     | 58                   |
|         | R: AAGACAGTCTTGCAGACAC      |                      |
| RT-ORF4 | F: CCGAACCAGTTCTTCGATGC     | 58                   |
|         | R: GACAAACGCAGTGAGTTGTC     |                      |
| RT-ORF5 | F: AACCACCATGAGTTGGATC      | 57                   |
|         | R: ACGGAATCGAGAGACCGTAC     |                      |
| RT-ORF6 | F: CCTGCTGGTACTAAAGTGTC     | 58                   |

---

|                |                                 |    |
|----------------|---------------------------------|----|
|                | R: TCCTCCTTCAAGCTGGCTC          |    |
| RT-ORF7        | F: TCAGTGCAAAGGGTTCAC           | 58 |
|                | R: GTTCTCCAATGGATGAGCA          |    |
| RT-ORF8        | F: ATCATGGTCGAGTCAGCCAC         | 58 |
|                | R: TCCTGGCTCCTGTTGTTGAG         |    |
| $\beta$ -actin | F: CTAGGATCCAAAATGGCCGATGGTGAGG | 58 |
|                | R:GAAACTCACCACCACGAACCAG        |    |

---

*R* and *O* represent that the forward primers are specific to the genes located in the MF2 subgenomes of *B. rapa* and *B. oleracea*, respectively. *C* represents that the forward primers are specific to the conservation region in the MF2 subgenomes between the two species. *F* indicates the forward primer.

TABLE S4.  $F_2$  sterile plants carrying recombination events between the *BnMs5* locus and markers

| Plant code | Genotype of the marker          |                                                  |                                 |                                                  |                                 |
|------------|---------------------------------|--------------------------------------------------|---------------------------------|--------------------------------------------------|---------------------------------|
|            | SCD7                            | SC9H                                             | SCD8                            | BE10                                             | SC6-a                           |
| 9J20       | <b><i>BnMs5<sup>a</sup></i></b> | <i>BnMs5<sup>b</sup>BnMs5<sup>b</sup></i>        | <i>BnMs5<sup>b</sup></i>        | <i>BnMs5<sup>b</sup>BnMs5<sup>b</sup></i>        | <i>BnMs5<sup>b</sup></i>        |
| 8D57       | <b><i>BnMs5<sup>a</sup></i></b> | <b><i>BnMs5<sup>a</sup>BnMs5<sup>b</sup></i></b> | <i>BnMs5<sup>b</sup></i>        | <i>BnMs5<sup>b</sup>BnMs5<sup>b</sup></i>        | <i>BnMs5<sup>b</sup></i>        |
| 8G24       | <b><i>BnMs5<sup>a</sup></i></b> | <b><i>BnMs5<sup>a</sup>BnMs5<sup>b</sup></i></b> | <i>BnMs5<sup>b</sup></i>        | <i>BnMs5<sup>b</sup>BnMs5<sup>b</sup></i>        | <i>BnMs5<sup>b</sup></i>        |
| 8M77       | <b><i>BnMs5<sup>a</sup></i></b> | <b><i>BnMs5<sup>a</sup>BnMs5<sup>b</sup></i></b> | <i>BnMs5<sup>b</sup></i>        | <i>BnMs5<sup>b</sup>BnMs5<sup>b</sup></i>        | <i>BnMs5<sup>b</sup></i>        |
| 8O83       | <b><i>BnMs5<sup>a</sup></i></b> | <b><i>BnMs5<sup>a</sup>BnMs5<sup>b</sup></i></b> | <i>BnMs5<sup>b</sup></i>        | <i>BnMs5<sup>b</sup>BnMs5<sup>b</sup></i>        | <i>BnMs5<sup>b</sup></i>        |
| 8U03       | <b><i>BnMs5<sup>a</sup></i></b> | <b><i>BnMs5<sup>a</sup>BnMs5<sup>b</sup></i></b> | <i>BnMs5<sup>b</sup></i>        | <i>BnMs5<sup>b</sup>BnMs5<sup>b</sup></i>        | <i>BnMs5<sup>b</sup></i>        |
| 8P95       | <b><i>BnMs5<sup>a</sup></i></b> | <b><i>BnMs5<sup>a</sup>BnMs5<sup>b</sup></i></b> | <i>BnMs5<sup>b</sup></i>        | <i>BnMs5<sup>b</sup>BnMs5<sup>b</sup></i>        | <i>BnMs5<sup>b</sup></i>        |
| 8V54       | <b><i>BnMs5<sup>a</sup></i></b> | <b><i>BnMs5<sup>a</sup>BnMs5<sup>b</sup></i></b> | <i>BnMs5<sup>b</sup></i>        | <i>BnMs5<sup>b</sup>BnMs5<sup>b</sup></i>        | <i>BnMs5<sup>b</sup></i>        |
| 8Y11       | <b><i>BnMs5<sup>a</sup></i></b> | <b><i>BnMs5<sup>a</sup>BnMs5<sup>b</sup></i></b> | <i>BnMs5<sup>b</sup></i>        | <i>BnMs5<sup>b</sup>BnMs5<sup>b</sup></i>        | <i>BnMs5<sup>b</sup></i>        |
| 9F26       | <b><i>BnMs5<sup>a</sup></i></b> | <b><i>BnMs5<sup>a</sup>BnMs5<sup>b</sup></i></b> | <i>BnMs5<sup>b</sup></i>        | <i>BnMs5<sup>b</sup>BnMs5<sup>b</sup></i>        | <i>BnMs5<sup>b</sup></i>        |
| 9J69       | <b><i>BnMs5<sup>a</sup></i></b> | <b><i>BnMs5<sup>a</sup>BnMs5<sup>b</sup></i></b> | <i>BnMs5<sup>b</sup></i>        | <i>BnMs5<sup>b</sup>BnMs5<sup>b</sup></i>        | <i>BnMs5<sup>b</sup></i>        |
| 9A84       | <b><i>BnMs5<sup>a</sup></i></b> | <b><i>BnMs5<sup>a</sup>BnMs5<sup>b</sup></i></b> | <i>BnMs5<sup>b</sup></i>        | <i>BnMs5<sup>b</sup>BnMs5<sup>b</sup></i>        | <i>BnMs5<sup>b</sup></i>        |
| 8K12       | <b><i>BnMs5<sup>a</sup></i></b> | <b><i>BnMs5<sup>a</sup>BnMs5<sup>b</sup></i></b> | <i>BnMs5<sup>b</sup></i>        | <i>BnMs5<sup>b</sup>BnMs5<sup>b</sup></i>        | <i>BnMs5<sup>b</sup></i>        |
| 8U27       | <b><i>BnMs5<sup>a</sup></i></b> | <b><i>BnMs5<sup>a</sup>BnMs5<sup>b</sup></i></b> | <i>BnMs5<sup>b</sup></i>        | <i>BnMs5<sup>b</sup>BnMs5<sup>b</sup></i>        | <i>BnMs5<sup>b</sup></i>        |
| 8I36       | <b><i>BnMs5<sup>a</sup></i></b> | <b><i>BnMs5<sup>a</sup>BnMs5<sup>b</sup></i></b> | <i>BnMs5<sup>b</sup></i>        | <i>BnMs5<sup>b</sup>BnMs5<sup>b</sup></i>        | <i>BnMs5<sup>b</sup></i>        |
| 9J93       | <b><i>BnMs5<sup>a</sup></i></b> | <b><i>BnMs5<sup>a</sup>BnMs5<sup>b</sup></i></b> | <i>BnMs5<sup>b</sup></i>        | <i>BnMs5<sup>b</sup>BnMs5<sup>b</sup></i>        | <i>BnMs5<sup>b</sup></i>        |
| 8P29       | <b><i>BnMs5<sup>a</sup></i></b> | <b><i>BnMs5<sup>a</sup>BnMs5<sup>b</sup></i></b> | <b><i>BnMs5<sup>a</sup></i></b> | <i>BnMs5<sup>b</sup>BnMs5<sup>b</sup></i>        | <i>BnMs5<sup>b</sup></i>        |
| 9E27       | <b><i>BnMs5<sup>a</sup></i></b> | <b><i>BnMs5<sup>a</sup>BnMs5<sup>b</sup></i></b> | <b><i>BnMs5<sup>a</sup></i></b> | <i>BnMs5<sup>b</sup>BnMs5<sup>b</sup></i>        | <i>BnMs5<sup>b</sup></i>        |
| 9G51       | <i>BnMs5<sup>b</sup></i>        | <i>BnMs5<sup>b</sup>BnMs5<sup>b</sup></i>        | <i>BnMs5<sup>b</sup></i>        | <b><i>BnMs5<sup>a</sup>BnMs5<sup>b</sup></i></b> | <b><i>BnMs5<sup>a</sup></i></b> |
| 8A36       | <i>BnMs5<sup>b</sup></i>        | <i>BnMs5<sup>b</sup>BnMs5<sup>b</sup></i>        | <i>BnMs5<sup>b</sup></i>        | <i>BnMs5<sup>b</sup>BnMs5<sup>b</sup></i>        | <b><i>BnMs5<sup>a</sup></i></b> |
| 8K74       | <i>BnMs5<sup>b</sup></i>        | <i>BnMs5<sup>b</sup>BnMs5<sup>b</sup></i>        | <i>BnMs5<sup>b</sup></i>        | <i>BnMs5<sup>b</sup>BnMs5<sup>b</sup></i>        | <b><i>BnMs5<sup>a</sup></i></b> |
| 8N46       | <i>BnMs5<sup>b</sup></i>        | <i>BnMs5<sup>b</sup>BnMs5<sup>b</sup></i>        | <i>BnMs5<sup>b</sup></i>        | <i>BnMs5<sup>b</sup>BnMs5<sup>b</sup></i>        | <b><i>BnMs5<sup>a</sup></i></b> |
| 8R32       | <i>BnMs5<sup>b</sup></i>        | <i>BnMs5<sup>b</sup>BnMs5<sup>b</sup></i>        | <i>BnMs5<sup>b</sup></i>        | <i>BnMs5<sup>b</sup>BnMs5<sup>b</sup></i>        | <b><i>BnMs5<sup>a</sup></i></b> |
| 8S94       | <i>BnMs5<sup>b</sup></i>        | <i>BnMs5<sup>b</sup>BnMs5<sup>b</sup></i>        | <i>BnMs5<sup>b</sup></i>        | <i>BnMs5<sup>b</sup>BnMs5<sup>b</sup></i>        | <b><i>BnMs5<sup>a</sup></i></b> |
| 8W47       | <i>BnMs5<sup>b</sup></i>        | <i>BnMs5<sup>b</sup>BnMs5<sup>b</sup></i>        | <i>BnMs5<sup>b</sup></i>        | <i>BnMs5<sup>b</sup>BnMs5<sup>b</sup></i>        | <b><i>BnMs5<sup>a</sup></i></b> |
| 8Y91       | <i>BnMs5<sup>b</sup></i>        | <i>BnMs5<sup>b</sup>BnMs5<sup>b</sup></i>        | <i>BnMs5<sup>b</sup></i>        | <i>BnMs5<sup>b</sup>BnMs5<sup>b</sup></i>        | <b><i>BnMs5<sup>a</sup></i></b> |
| 9D48       | <i>BnMs5<sup>b</sup></i>        | <i>BnMs5<sup>b</sup>BnMs5<sup>b</sup></i>        | <i>BnMs5<sup>b</sup></i>        | <i>BnMs5<sup>b</sup>BnMs5<sup>b</sup></i>        | <b><i>BnMs5<sup>a</sup></i></b> |
| 9G43       | <i>BnMs5<sup>b</sup></i>        | <i>BnMs5<sup>b</sup>BnMs5<sup>b</sup></i>        | <i>BnMs5<sup>b</sup></i>        | <i>BnMs5<sup>b</sup>BnMs5<sup>b</sup></i>        | <b><i>BnMs5<sup>a</sup></i></b> |

Marker genotypes in **bold** indicates a recombination event between the corresponding marker and plant.

FIG. S1. Semi-quantitative RT-PCR of the candidate genes. Floral buds with length (1) less than 1 mm, (2) from 1 to 2 mm, (3) from 2 to 3.5 mm and (4) from 3.5 to 5 mm, were collected from the temporary maintainer line 7-5 for total RNA extraction. *B. napus*  $\beta$ -actin gene was used as an internal positive control.

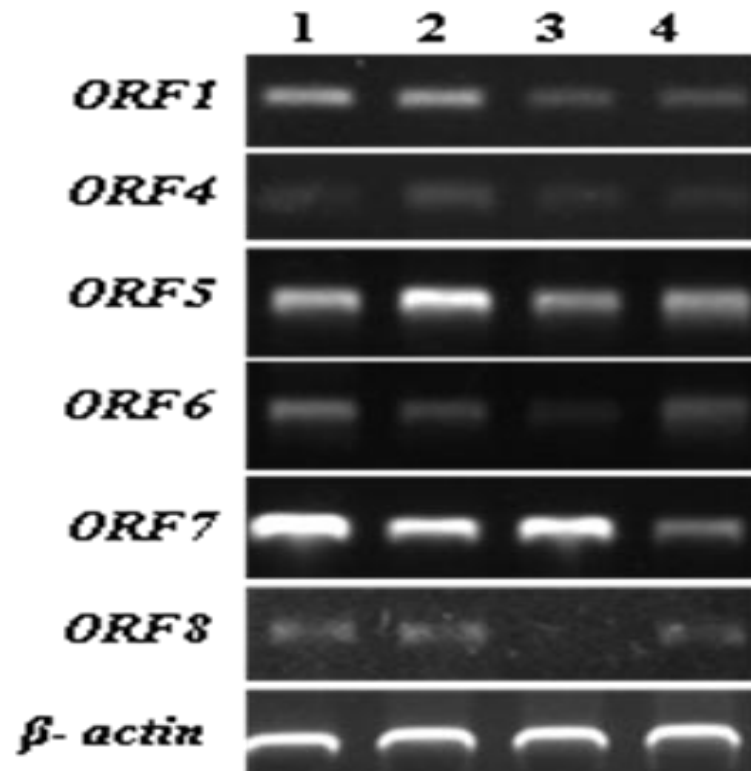

Supplement: supp_mcs260_mcs260supp.pdf [file supp_mcs260_mcs260supp.pdf]
